# Supplementary material for: Developing Early-Career Clinical Educators – A Qualitative Study of a Pedagogical Internship Track for Junior Doctors in Sweden
Source: Research Square preprint supplement (doi:10.21203/rs.3.rs-8062096/v1), 2026-02-02
Supplement: Supplementary file 1 [file 12188a1bf9e52ffa7b12b79a.pdf]

| VARIABLE              | DESCRIPTION                                                                                                                                                   |
|-----------------------|---------------------------------------------------------------------------------------------------------------------------------------------------------------|
| Number of respondents | 10                                                                                                                                                            |
| Age (years)           | 29–46                                                                                                                                                         |
| Sex                   | 6 females, 4 males                                                                                                                                            |
| Medical education     | Swedish universities                                                                                                                                          |
| Year of graduation    | 2018–2022                                                                                                                                                     |
| Enrolled in program   | 2018–2024                                                                                                                                                     |
| Current specialties   | Anesthesiology & Intensive Care; Family Medicine; Infectious Disease; Pediatrics; Orthopedic Surgery; Gynecology & Obstetrics; Psychiatry; Emergency Medicine |
