# Supplementary material for: Developing Early-Career Clinical Educators – A Qualitative Study of a Pedagogical Internship Track for Junior Doctors in Sweden
Source: Research Square preprint supplement (doi:10.21203/rs.3.rs-8062096/v1), 2026-02-02
Supplement: Supplementary file 2 [file fe4fa3451862db63de10bd54.pdf]

| THEME                                | SUB-THEME                                                                            | EXAMPLE QUOTE                                                                                                                                                                                                                                                                                                                                                                                      |
|--------------------------------------|--------------------------------------------------------------------------------------|----------------------------------------------------------------------------------------------------------------------------------------------------------------------------------------------------------------------------------------------------------------------------------------------------------------------------------------------------------------------------------------------------|
| Building a pedagogical toolbox       | Acquiring formal and practical education on medical simulations and feedback methods | “Both the basic pedagogical course and the simulation instruction course give you a lot of tools to use when supervising and it feels like you can put more thought into it, even if you have a stressful everyday life. I think you got a lot of tips and tricks on how to think and how to do things... and I think that you have a baseline of a pedagogical mindset during your workday.” (R1) |
|                                      | Emphasizing feedback                                                                 | “Well, I would say above all that I’ve become much better at giving feedback – really, much better. I would say that is the most clearly tangible thing I have improved after the program.” (R5)                                                                                                                                                                                                   |
|                                      | Orchestrating teaching events and activities on a logistical level                   | "What I have learned is a little bit about planning, how to plan and organize, partly a lecture and partly how to plan an educational day." (R6)                                                                                                                                                                                                                                                   |
|                                      | Possibility to have influence                                                        | “The strength during this time was that I got to reflect and be involved in shaping my own internship. Since I participated, I could influence how the other intern doctors experienced these simulation days. I chose scenarios based on what I felt I needed to learn more about.” (R4)                                                                                                          |
| Establishing professional legitimacy | Pedagogical experience as career advantage                                           | “It should really be said, I also think you will notice later when applying for jobs that it is a major merit, and everyone thinks, I mean, it sounds very good to know about pedagogy... people are very interested and curious, and it allows you to stand out in a way that is very advantageous.” (R5)                                                                                         |
|                                      | Group credibility                                                                    | “I think the strengths have also been that you are in a group, that you can develop, and you can get a bit of inspiration from each other.” (R7)                                                                                                                                                                                                                                                   |
|                                      | Having a local contact network within the hospital/workplace                         | “You get a very good foundation if you are interested in pedagogy and leadership, especially if you stay within the same hospital. You have contacts, you know, like [name of chief of internship and head program director], you know who they are and can email them, and hopefully they remember your name. That alone makes a big difference, I think.” (R2)                                   |
| Becoming a clinical teacher          | Growing confidence as a clinical teacher                                             | “Yes, I think it gives credibility in pedagogical matters.” (R3)                                                                                                                                                                                                                                                                                                                                   |
|                                      | Developing a culture of peer teaching and learning                                   | “Being relatively close to each other academically and career-wise makes it easier to understand how the other person thinks and reasons; it can be harder if you have been a consultant for 30 years to sense the medical student’s needs.” (R9)                                                                                                                                                  |
|                                      | Taking on new roles as clinical teachers                                             | “I am solely responsible for [the medical students’] education Monday to Friday full days, which is very tough but also very fun. I have faced many challenges in this, but it feels reassuring to have had a lot of pedagogical training behind me.” (R4)                                                                                                                                         |

R = Respondent
